# Supplementary material for: DFT investigation of the electronic and optical properties of hexagonal MX2/ZrXO (M = W, Mo and X = S, Se) van der Waals heterostructures for photovoltaic solar cell application
Source: Royal Society of Chemistry journal article supplement (doi:10.1039/d2ra05310a), 2022-01-01
Supplement: d2ra05310a1.pdf [file d2ra05310a1.pdf]

## Supporting Information

# **DFT investigation of the electronic and optical properties of hexagonal MX<sub>2</sub>/ZrXO (M= W, Mo and X = S, Se) van der Waals heterostructures for photovoltaic solar cell application Study**

Aman kassaye Sibhatu<sup>a,d</sup>, Tamiru Teshome<sup>b</sup>, Omololu Akin-Ojo<sup>c</sup>, Abubeker Yimam<sup>\*a</sup>, Georgies Alen Asres<sup>\*d</sup>

---

<sup>a</sup>Department of Chemical Engineering, School of Chemical and Bio Engineering,  
Addis Ababa institute of Technology, Addis Ababa University, Addis Ababa, Ethiopia

<sup>b</sup>Department of Physics, College of Natural and Social Science, Addis Ababa Science and Technology University, P. O. Box 16417,  
Addis Ababa, Ethiopia

<sup>c</sup>ICTP-East Africa Institute for Fundamental Research University of Rwanda, Kigali, Rwanda.

<sup>d</sup>Centre for Materials Engineering, Addis Ababa Institute of Technology, Addis Ababa University, School of Multi-disciplinary  
Engineering, Addis Ababa, 1000, Ethiopia

† Corresponding authors; email: - georgies.alene@aait.edu.et; tel:- +251 902639816

Corresponding authors; email: - abubeker.yimam@aait.edu.et; tel:- +251 911950214

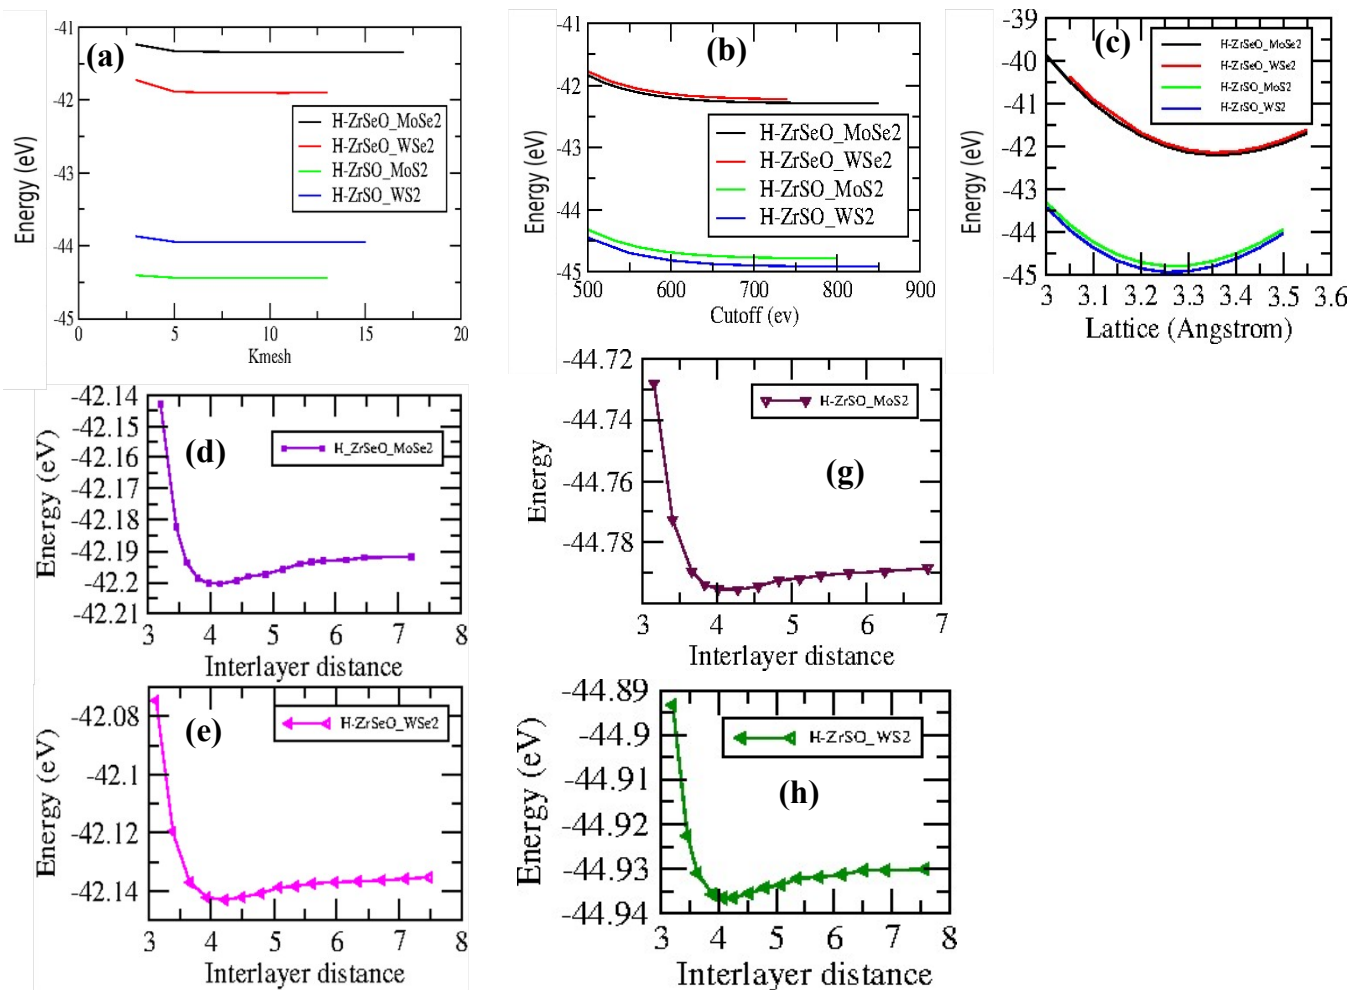

Figure S1: Convergence and geometrical optimization results of the heterostructures (a) k-mesh, (b) Cutoff Energy, (c) Lattice parameter, (d-h) Interlayer Distance, for the material's MoSe2/ZrSeO, WSe2/ZrSeO, MoS2/ZrSO, and WS2/ZrSO

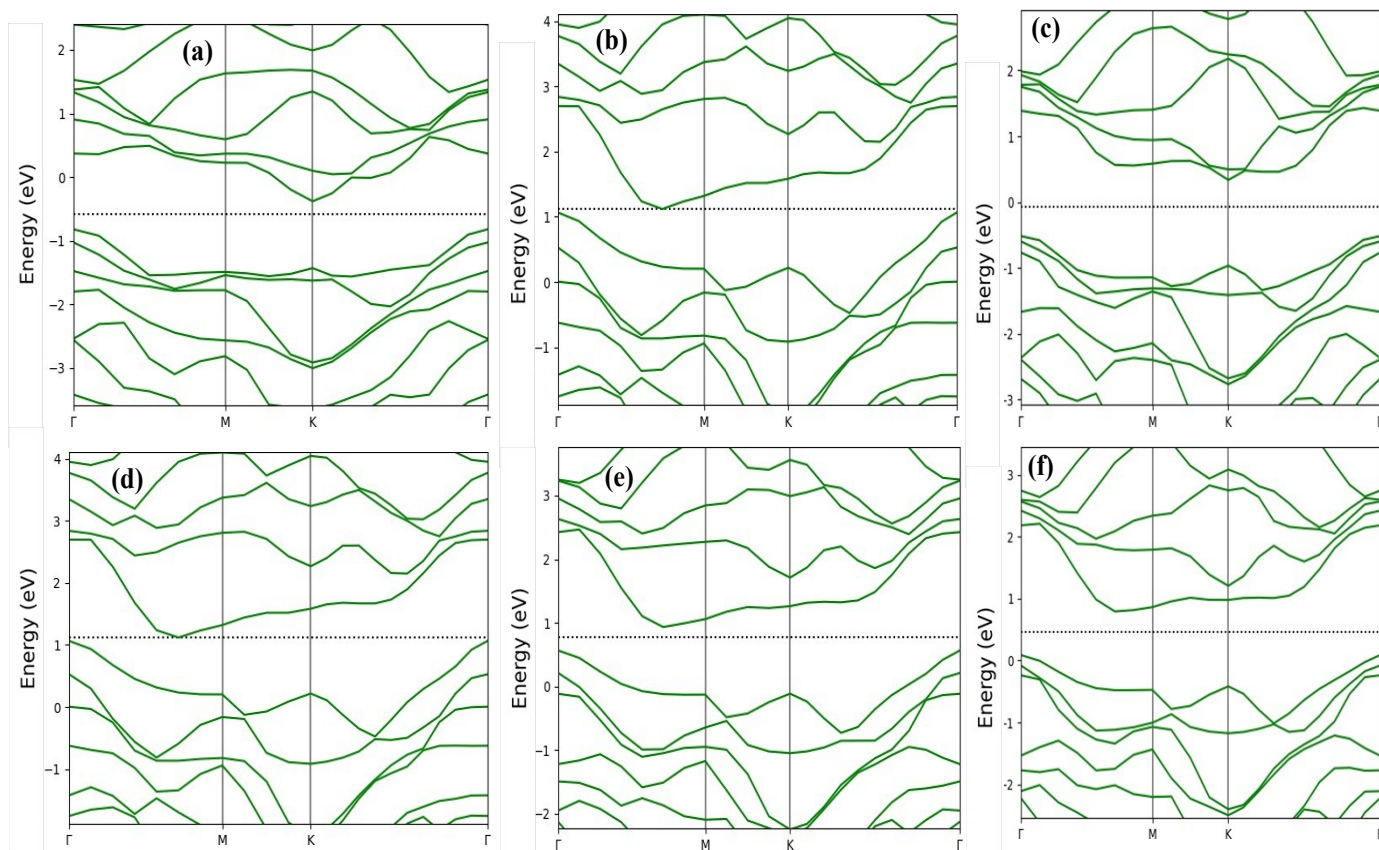

Figure S2: Band structure of the Strain effect on the band gap of the heterostructure materials (a-c) tensile strain applied with the value of (+6, +4 and +2) and (d-f) compressive strain with the value of (-6, -4, and -2) respectively

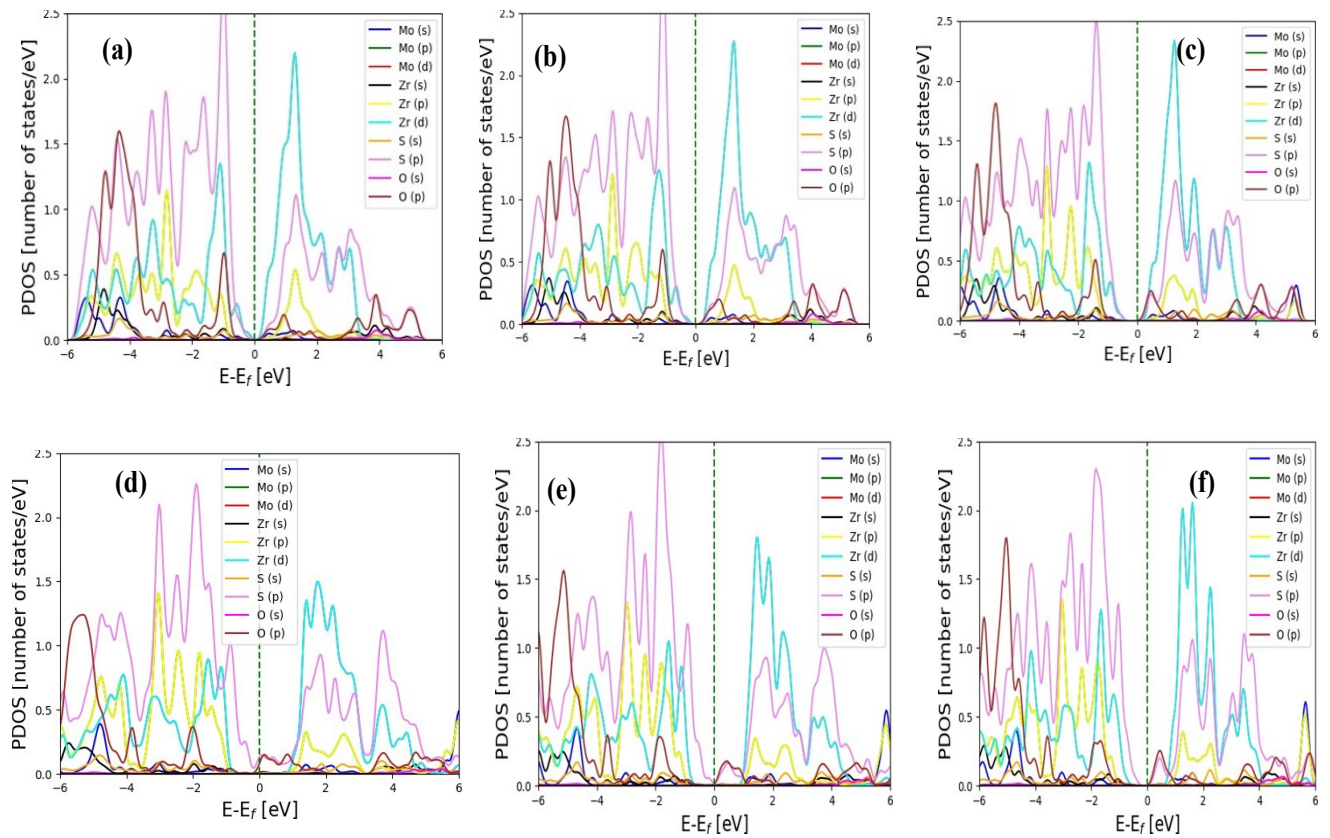

Figure S3: Project density of state for the strain effect on the band gap of the heterostructure materials (a-c) tensile strain applied with the value of (+6, +4 and +2) and (d-f) compressive strain with the value of (-6, -4, and -2) respectively

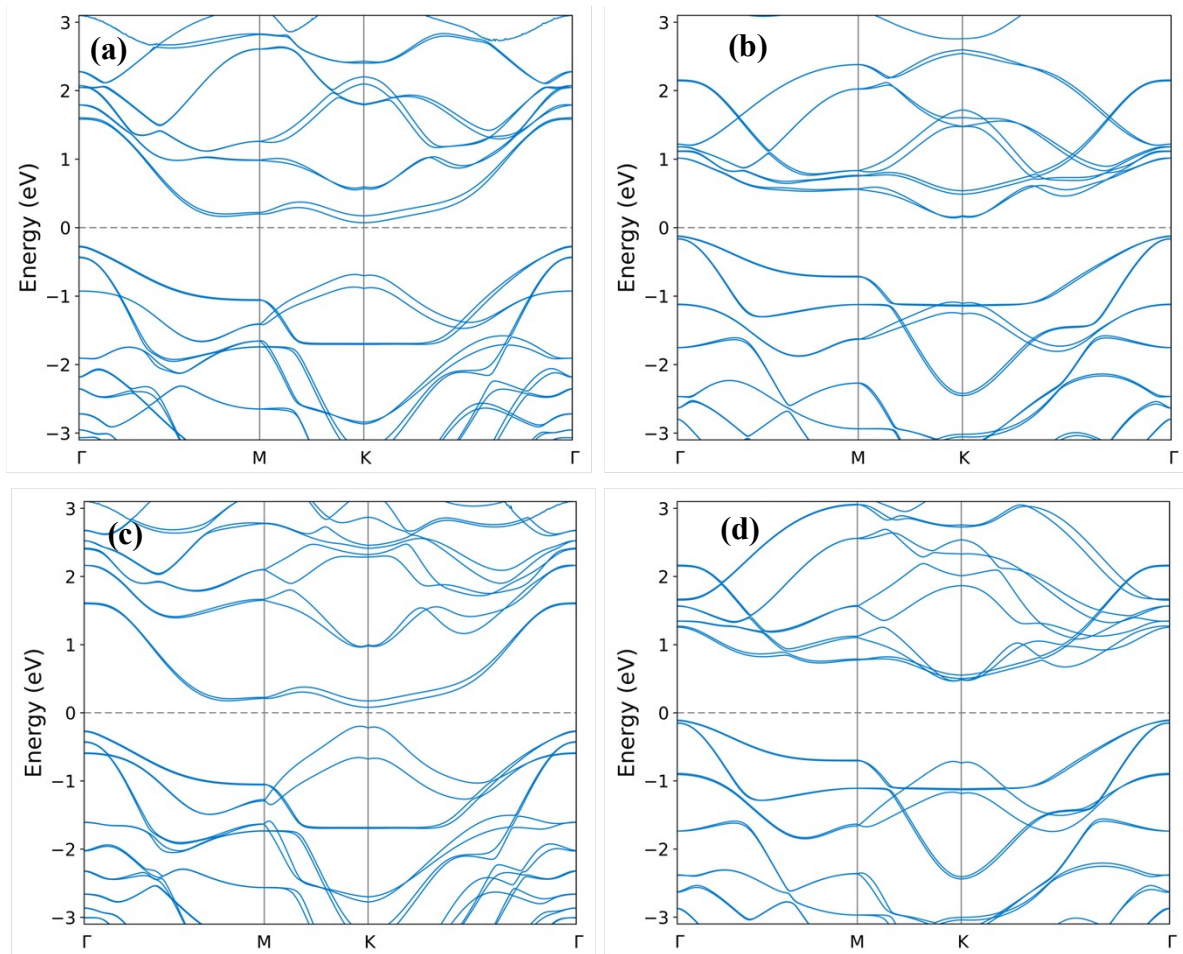

Figure S4: Band structures of (a) MoSe<sub>2</sub>/ZrSeO, (b) MoS<sub>2</sub>/ZrSO, (c) WSe<sub>2</sub>/ZrSeO, and (d) WS<sub>2</sub>/ZrSO vdW heterostructures using spin orbital coupling (SOC) effect, respectively.
